# Supplementary material for: Models of Fish Swarm Passing through Tubes
Source: Research Square preprint supplement (doi:10.21203/rs.3.rs-4746257/v1), 2024-08-09
Supplement: Supplementary file [file ea16f45b2cd4365a3961c504.pdf]

# Supplementary Material

---

---

## 1. Movies

### 1.1. *Movie S1*

The movies S1-S8 were cut from the original persistent movies, and this movie represented the segment during which the fish swam collectively in Tube A as a swarm.

### 1.2. *Movie S2*

This movie represented the segment during which the fish swam collectively in Tube B as a swarm.

### 1.3. *Movie S3*

This movie represented the segment during which the fish swam collectively in Tube C as a swarm.

### 1.4. *Movie S4*

This movie represented the segment during which the fish swam collectively in Tube D as a swarm.

### 1.5. *Movie S5*

This movie represented the segment during which the fish swam collectively in Tube E as a swarm.

### 1.6. *Movie S6*

This movie represented the segment during which the fish swam collectively in Tube F as a swarm.

### 1.7. *Movie S7*

This movie represented the segment during which the fish swam collectively in Tube G as a swarm.

### *1.8. Movie S8*

This movie represented the segment during which the fish swam collectively in Tube H as a swarm.

### *1.9. Movie S9*

This was an algorithm simulation of the three swarm models put forward in this paper.

## **2. Datasets**

### *2.1. .csv files*

The eight tubes in this paper were named as Tube A, B, C, D, E, F, G and H. In the following files for data processing, they corresponded to 0-2, 0-3, 1-2, 1-3, 2-1, 2-2, 3-1 and 3-2 in turn. Original statistics of trajectory recognized by the software of Zootracer were saved here.

### *2.2. keyframe*

Here were statistics of keyframes withdrawn from the .csv files.

### *2.3. coordinates frame by frame*

Key frames were imported into Matlab and were filed through the fitting, so positions frame by frame were gained.

### *2.4. parameters in specific frames*

Each tube corresponded to a file, including several tables that saved the speed, position, and direction of 16 fish at this moment.

### *2.5. speed and direction of 16 fish in keyframes in eight tubes*

In each tube, 16 fish were chosen as research objects. For instance, the table named “0208” represented the fish numbered “08” in Tube A. Speed in two dimensions and direction in keyframes of this fish were saved in this table.

### *2.6. average speed in each tube*

Here were the average speeds of 16 fish in each tube in keyframes, and there was an additional file, which saved speeds and directions of fish in eight tubes in their own frame which fitted requirement of the swarm the best.

### *2.7. normalized two-dimensional position in eight tubes*

Each file corresponded to a tube, saving original coordinates and normalized coordinates in the frame of the swarm of 16 fish in this tube.

### *2.8. speed of 16 fish in the most useful frame in eight tubes*

Each file corresponded to a tube, saving speeds, direction, and normalized coordinates in the frame of the swarm of 16 fish in this tube.

### *2.9. speed and location in the middle region and edge region*

There were eight files, respectively belonging to the eight tubes. Each file saved some tables, recording speeds, positions and directions of 16 fish at this moment. The names of the tables represented the number of frames corresponding to these statistics.
